# Supplementary material for: The MERTK/FLT3 inhibitor MRX-2843 overcomes resistance-conferring FLT3 mutations in acute myeloid leukemia
Source: JCI journal article supplement (doi:10.1172/jci.insight.85630), 2016-03-16
Supplement: sd1 [file 1]

## Supplemental Tables and Figures

| MRX-2843 Estimated Cellular Kinase Selectivity (IC <sub>90</sub> 's) |     |                        |     |
|----------------------------------------------------------------------|-----|------------------------|-----|
| Kinase                                                               | nM  | Kinase                 | nM  |
| FLT3                                                                 | 8   | PHKG1                  | 329 |
| MER                                                                  | 17  | FGFR2                  | 354 |
| TRKA                                                                 | 48  | KDR                    | 383 |
| AXL                                                                  | 47  | PDGFR $\alpha$ [V561D] | 407 |
| LOK                                                                  | 68  | DDR1                   | 434 |
| TRKC                                                                 | 136 | CLK2                   | 463 |
| SLK                                                                  | 143 | SIK                    | 501 |
| TYRO3                                                                | 150 | FGFR3                  | 514 |
| NuaK1                                                                | 162 | FGFR4[V550L]           | 570 |
| KIT                                                                  | 182 | PDGFR $\alpha$         | 605 |
| FLT4                                                                 | 206 | PDGFR $\beta$          | 708 |
| MAP4K2                                                               | 209 | IRR                    | 780 |
| TRKB                                                                 | 222 | CDK6 /CycD3            | 814 |
| FLT1                                                                 | 232 | KIT[T670I]             | 821 |
| MELK                                                                 | 243 | RSK1                   | 867 |
| FGFR1                                                                | 244 | RSK4                   | 884 |
| QIK                                                                  | 246 | DDR2                   | 929 |
| KIT[V654]                                                            | 262 | AurB/INCENP            | 945 |

**Table S1**

Predicted concentration required for 90% inhibition of each reported kinase in cellular systems. Estimate takes into account the IC<sub>50</sub> in an *in vitro* kinase assay, the  $K_m$  for ATP of each kinase and the cell permeability estimated from MERTK, AXL, TYRO3 and FLT3 cellular assays.

|                      | MRX-2843     |      | AC220        |       |
|----------------------|--------------|------|--------------|-------|
|                      | IC50<br>(nM) | SEM  | IC50<br>(nM) | SEM   |
| Parental BA/F3 + IL3 | 272.5        | 65.1 | 586.9        | 231.3 |
| ITD                  | 3.0          | 0.5  | 0.24         | 0.04  |
| D835Y                | 1.3          | 0.3  |              |       |
| D835V                | 1.4          | 0.3  |              |       |
| ITD+D835Y            | 7.2          | 1.3  | 24.9         | 4.1   |
| ITD+F691L            | 20.4         | 4.3  | 93.3         | 18.4  |
| ITD+F691I            | 102.7        | 33.2 |              |       |
| ITD+Y842H            | 6.9          | 1.9  |              |       |
| ITD+Y842C            | 11.9         | 3.5  |              |       |
| ITD+D835F            | 9.2          | 1.8  |              |       |
| ITD+D835V            | 7.8          | 1.6  |              |       |
| MOLM-14              | 19.1         | 4.7  |              |       |
| MOLM-14:D835Y        | 21.7         | 4.3  |              |       |
| MOLM-14:F691L        | 34.8         | 7.9  |              |       |

**Table S2**

MRX-2843 retains activity against quizartinib resistant FLT3 mutant proteins. IC<sub>50</sub> values were generated from the data shown in Figure 6 and S3.

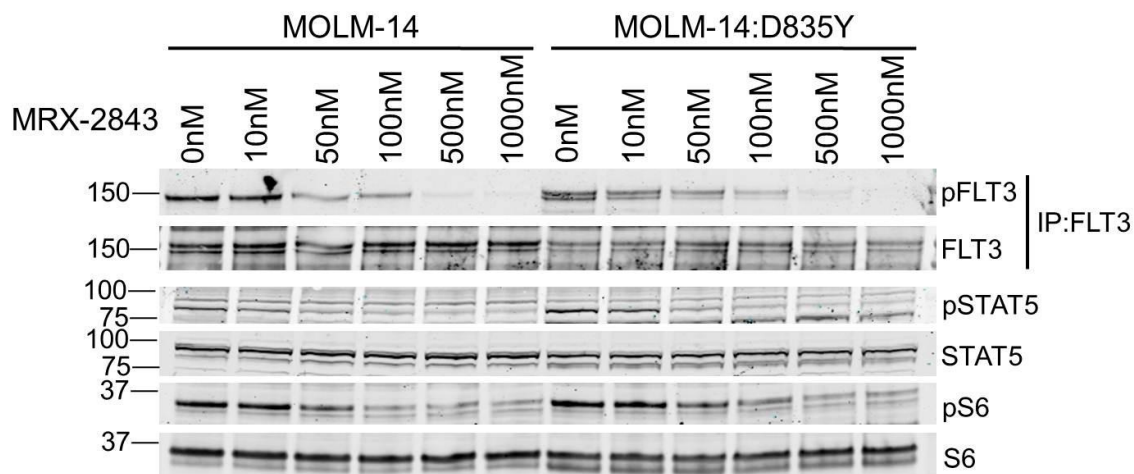

### Figure S1

MRX-2843 inhibits activation of FLT3 and downstream effectors in the presence of human plasma. MOLM-14 parental and MOLM-14:D835Y cells were cultured for 2 hours in 100% human plasma with the indicated concentrations of MRX-2843. Lysates were prepared and phosphorylated and total proteins were detected by immunoblot.

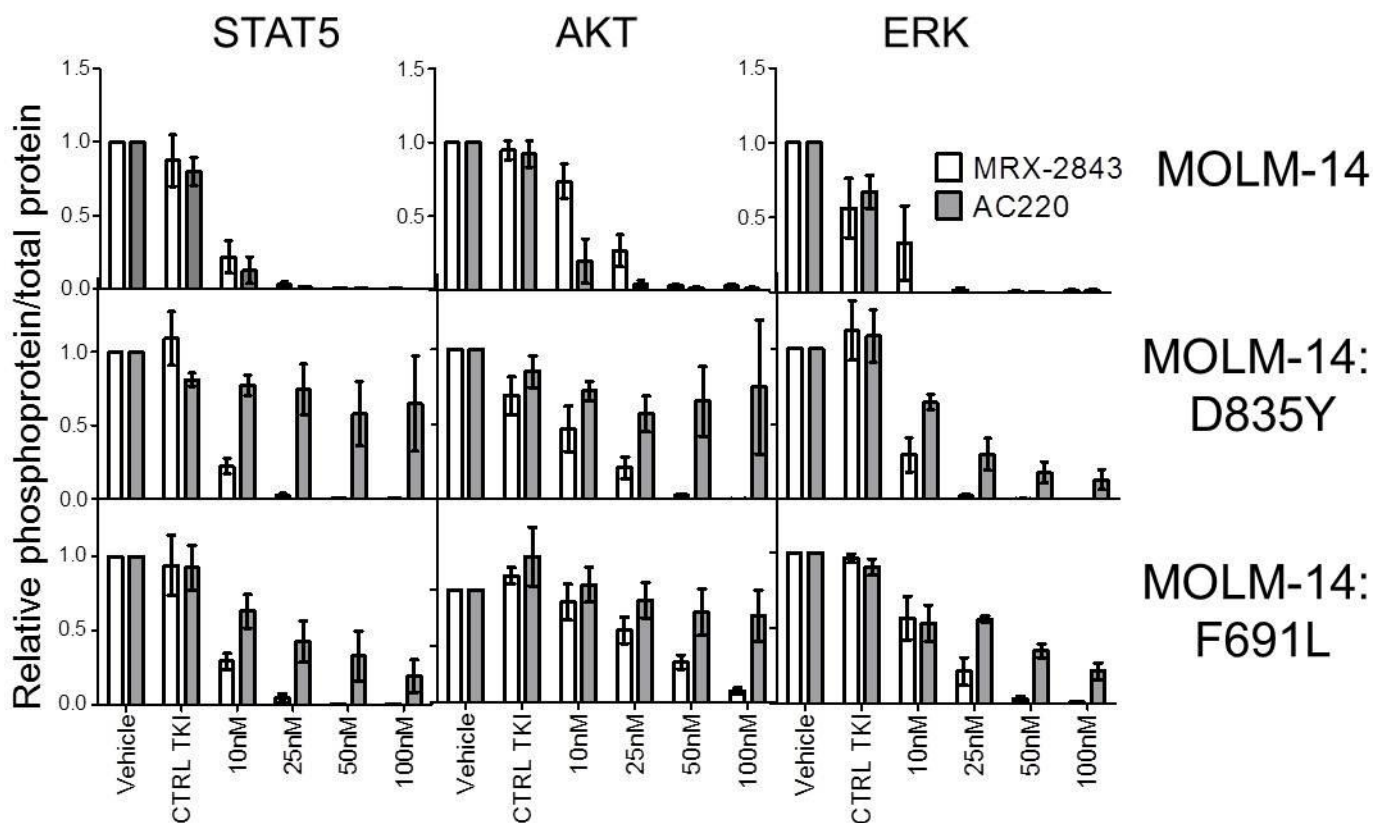

**Figure S2**

MRX-2843 abrogates activation of signaling through pathway components downstream of FLT3 in cell lines resistant to quizartinib. Phosphorylation of downstream effectors was analyzed by immunoblot as shown in Figure 6. Phosphorylated and total proteins were quantitated by densitometry and expression of phosphorylated protein relative to total protein was determined. Mean values and standard errors derived from 3 independent experiments are shown.

**A**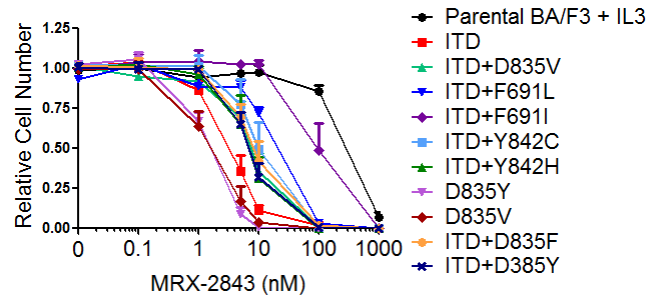**B**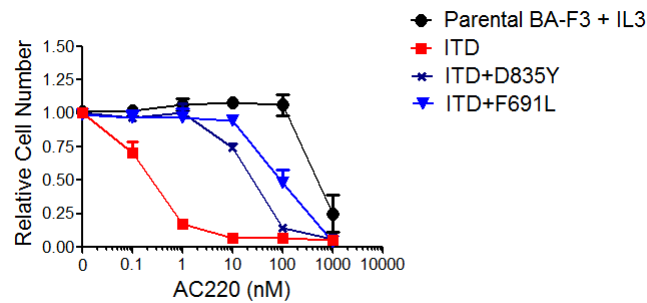

### Figure S3

MRX-2843 retains activity against quizartinib-resistant FLT3-ITD mutant proteins identified by saturation mutagenesis screening. BA/F3 cells expressing FLT3-ITD or FLT3-ITD mutant protein were cultured for 48 hours in the absence of IL-3 and with the indicated concentrations of MRX-2843 (A) or quizartinib (B) and relative numbers of viable cells were determined as described in Figure 6A. Cultures grown in the presence of IL-3 are shown for reference (Parental BA/F3+IL3). Mean values and standard errors were derived from 3 independent experiments.
